# Supplementary material for: The Vicious Cycle of Melanoma-Microglia Crosstalk: Inter-Melanoma Variations in the Brain-Metastasis-Promoting IL-6/JAK/STAT3 Signaling Pathway
Source: MDPI journal article supplement (doi:10.3390/cells12111513), 2023-05-30
Supplement: s1 [file s1]

**Supplementary Table S3.** List of antibodies utilized in Nanostring GeoMx DSP.

| Antibody/Reagents     | Catalogue no.   | Wavelength (nm) | Concentration | Source                     |
|-----------------------|-----------------|-----------------|---------------|----------------------------|
| Melan-A/MART-1 (A103) | NBF2-46603AF532 | 532 (Cy3)       | 1:150         | Novus Biologicals, CO, USA |
| CD45                  | FAB1430T-100    | 594 (Texas Red) | 1:100         | R&D Systems, MN, USA       |
| Iba1                  | MABN92-AF647    | 647 (Cy5)       | 1:100         | EMD Millipore, CA, USA     |
| SYTO 13               | S7575           | 488 (FITC)      | 1:2000        | ThermoFisher, MA, USA      |
