# Supplementary material for: The Vicious Cycle of Melanoma-Microglia Crosstalk: Inter-Melanoma Variations in the Brain-Metastasis-Promoting IL-6/JAK/STAT3 Signaling Pathway
Source: MDPI journal article supplement (doi:10.3390/cells12111513), 2023-05-30
Supplement: s1 [file s1]

**Supplementary Table S1.** List of antibodies utilized in the study.

| Antibody                                      | Catalogue no. | Origin <sup>2</sup> | Application      | Concentration | Manufacturer details                              |
|-----------------------------------------------|---------------|---------------------|------------------|---------------|---------------------------------------------------|
| Polyclonal Anti-AIF-1/Iba1                    | NB100-1028    | Goat                | IHC (frozen)     | 1:100         | Novus Biologicals, Centennial, CO, USA            |
| Polyclonal Anti-Alix                          | ab76608       | Rb                  | WB               | 1:500         | Abcam, Cambridge, MA, USA                         |
| Polyclonal Anti-beta Tubulin                  | ab6046        | Rb                  | WB               | 1:1000        | Abcam, Cambridge, UK                              |
| CD16 Antibody, anti-human, REAfinity™         | 130-113-951   | Ms                  | FACS             | 1:50          | Miltenyi Biotec, Bergisch Gladbach, Germany       |
| CD32 Antibody, anti-human                     | 130-127-008   | Ms                  | FACS             | 1:50          | Miltenyi Biotec, Bergisch Gladbach, Germany       |
| Monoclonal Anti-CD63 (H5C6)                   | 556019        | Ms                  | WB               | 1:1000        | BD Pharmingen, San Jose, CA, USA                  |
| Monoclonal Anti-CD81 (JS-81)                  | 555675        | Ms                  | WB               | 1:200         | BD Pharmingen, San Jose, CA, USA                  |
| CD86 Antibody, anti-human, REAfinity™         | 130-116-264   | Ms                  | FACS             | 1:50          | Miltenyi Biotec, Bergisch Gladbach, Germany       |
| CD150 (SLAM) Antibody, anti-human, REAfinity™ | 130-099-722   | Ms                  | FACS             | 1:50          | Miltenyi Biotec, Bergisch Gladbach, Germany       |
| CD163 Antibody, anti-human, REAfinity™        | 130-112-287   | Ms                  | FACS             | 1:50          | Miltenyi Biotec, Bergisch Gladbach, Germany       |
| CD206 Antibody, anti-human                    | 130-124-012   | Ms                  | FACS             | 1:50          | Miltenyi Biotec, Bergisch Gladbach, Germany       |
| Monoclonal Anti-Human IL-6R alpha             | MAB227        | Ms                  | FACS             | 1 µg/ml       | R&D Systems, Minneapolis, MA, USA                 |
| Monoclonal Anti-Human IL-6R alpha             | MAB227        | Ms                  | Inhibition assay | 1 µg/ml       | R&D Systems, Minneapolis, MA, USA                 |
| Polyclonal Anti-SOCS3                         | ab16030       | Rb                  | IHC (frozen)     | 1:50          | Abcam, Cambridge, MA, USA                         |
| Polyclonal Anti-SOCS3                         | ab16030       | Rb                  | WB               | 1:1000        | Abcam, Cambridge, MA, USA                         |
| Polyclonal Anti-SOCS3                         | ab16030       | Rb                  | IF               | 1:240         | Abcam, Cambridge, MA, USA                         |
| Monoclonal Anti-phospho-Stat3 (Tyr705) (D3A7) | 9145          | Rb                  | WB               | 1:1000        | Cell Signaling Technology, Inc., Danvers, MA, USA |
| Monoclonal Anti-Stat3 (124H6)                 | 9139          | Ms                  | WB               | 1:500         | Cell Signaling Technology, Inc., Danvers, MA, USA |

<sup>2</sup>Ms: mouse, Rb: rabbit.
