# Supplementary material for: The Vicious Cycle of Melanoma-Microglia Crosstalk: Inter-Melanoma Variations in the Brain-Metastasis-Promoting IL-6/JAK/STAT3 Signaling Pathway
Source: MDPI journal article supplement (doi:10.3390/cells12111513), 2023-05-30
Supplement: s1 [file s1]

**Supplemental Table S2.** List of Oligonucleotide Primers used for RT-qPCR.

| Gene Symbol and<br>Accession No. <sup>1</sup> | Sense Primer <sup>2</sup>   | Anti-Sense Primer        |
|-----------------------------------------------|-----------------------------|--------------------------|
| RS9 (NM_001013)                               | 5'-CGGAGACCCTTCGAGAAATCT-3' | 5'-GCCCATACTCGCCGATCA-3' |
| SOCS3 (NM_003955)                             | 5'-CCATTCGGGAGTTCCTGGAC-3'  | 5'-TTGGCTTCTTGCTTGTGC-3' |

<sup>1</sup> RS9: Ribosomal subunit 9; SOCS3: Suppressor of cytokine signaling 3.

<sup>2</sup> RT-qPCR primer sequences as obtained from the GenBank Nucleotide Database of the NCBI database.
